# Supplementary material for: Fabrication of potato-like silver molybdate microstructures for photocatalytic degradation of chronic toxicity ciprofloxacin and highly selective electrochemical detection of H2O2
Source: PubMed Central journal article supplement (PMC5037444; doi:10.1038/srep34149), 2016-09-27
Supplement: srep34149-s1.pdf [file srep34149-s1.pdf]

**Fabrication of potato-like silver molybdate microstructure for photocatalytic degradation of chronic toxicity ciprofloxacin and highly selective electrochemical detection of H<sub>2</sub>O<sub>2</sub>**

**J.Vinoth Kumar<sup>1</sup>, R.Karthik<sup>2</sup>, Shen-Ming Chen<sup>2\*</sup>, V. Muthuraj<sup>1\*\*</sup> & Chelladurai**

**Karuppiah<sup>2,3</sup>**

<sup>1</sup>Department of Chemistry, VHNSN College, Virudhunagar – 626001, Tamilnadu, India.

<sup>2</sup>Department of Chemical Engineering, National Taipei University of Technology, No. 1, Section 3, Chung-Hsiao East Road, Taipei 106, Taiwan, ROC.

<sup>3</sup>Department of Chemistry, National Taiwan University, No. 1, Sec. 4, Roosevelt Rd, Daan District, Taipei, Taiwan-10617.

**\* Authors for Correspondence**

E-mail: [smchen78@ms15.hinet.net](mailto:smchen78@ms15.hinet.net), Tel: +886 2270 17147, Fax: +886 2270 25238.

E-mail: [muthuraj75@gmail.com](mailto:muthuraj75@gmail.com), Tel: +919940965228

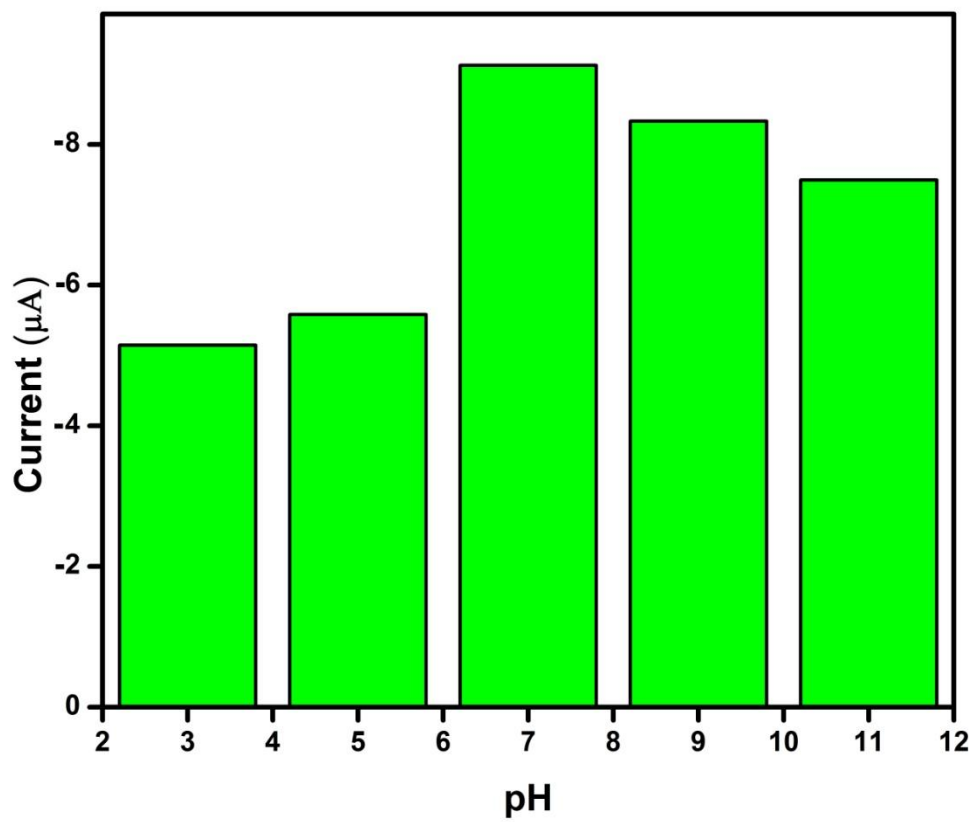

**Fig. S1** The calibration plot for effect of pH vs. reduction peak current response of 200 μM

H<sub>2</sub>O<sub>2</sub>.

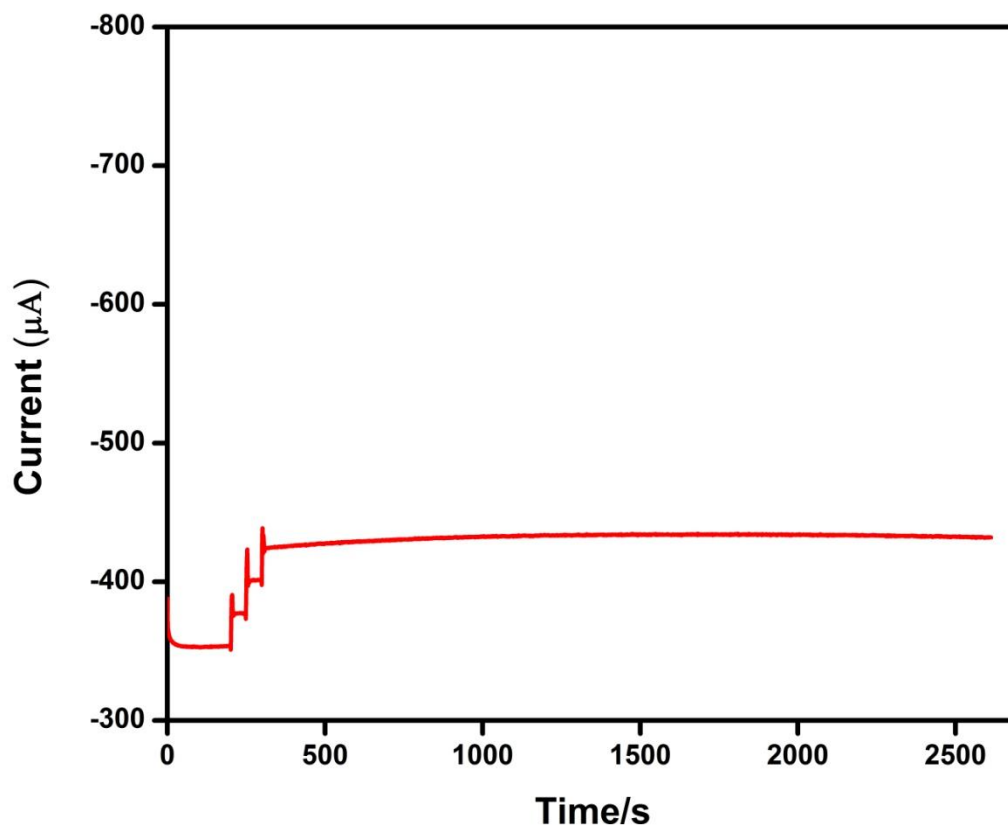

Fig.S2. Amperometric  $i-t$  response of  $\text{Ag}_2\text{MoO}_4$  modified RDGCE for addition of  $150 \mu\text{M}$  of  $\text{H}_2\text{O}_2$  (a) into the constantly stirred  $\text{N}_2$  saturated PBS and the background current response up to 2600 s; working potential =  $-0.5 \text{ V}$ .
